# Supplementary material
Source: ML conference proceedings conference paper supplement (https://openreview.net/forum?id=Nx4gNemvNvx)
Supplement: supplementary_material [file attachment]

## A Proofs

In this section, we provide complete proofs for each lemma and theorem.

### A.1 Proof of Lemma 1

Notice that  $|\mathcal{I}(t)| = |\mathcal{M}(t) \cap \mathcal{C}(t)| \leq |\mathcal{M}(t)|$ . By definition of  $\mathcal{M}(t)$  in (6), we have  $\mathcal{M}(t) = \mathcal{V} \setminus (\mathcal{T}_{\max}^\mu(t) \cup \mathcal{T}_{\min}^\mu(t))$ . Definitions of  $\mathcal{T}_{\max}^\mu(t)$  and  $\mathcal{T}_{\min}^\mu(t)$  give  $|\mathcal{T}_{\max}^\mu(t)| = |\mathcal{T}_{\min}^\mu(t)| = \lfloor \beta n \rfloor$ . Then we have  $|\mathcal{M}(t)| = |\mathcal{V} \setminus (\mathcal{T}_{\max}^\mu(t) \cup \mathcal{T}_{\min}^\mu(t))| = n - 2\lfloor \beta n \rfloor$ , which indicates that  $|\mathcal{I}(t)| \leq n - 2\lfloor \beta n \rfloor$ .

Since  $\mathcal{M}(t) \cup \mathcal{C}(t) \subseteq \mathcal{V}$ , then it holds that  $|\mathcal{M}(t) \cup \mathcal{C}(t)| \leq n$ . By definition of  $\mathcal{C}(t)$  in (6), we have  $|\mathcal{C}(t)| = n - 2\lfloor \beta n \rfloor$ . Therefore, we have  $|\mathcal{I}(t)| = |\mathcal{M}(t) \cap \mathcal{C}(t)| = |\mathcal{M}(t)| + |\mathcal{C}(t)| - |\mathcal{M}(t) \cup \mathcal{C}(t)| \geq n - 4\lfloor \beta n \rfloor$ . Since  $\beta < \frac{1}{4}$ , we have  $|\mathcal{I}(t)| > 0$ , i.e.,  $\mathcal{I}(t) \neq \emptyset$ .

### A.2 Proof of Lemma 2

Notice that  $\mathcal{I}(t) = \mathcal{M}(t) \cap \mathcal{C}(t)$ . Recall that in Step 2 of Section 3.2,  $\check{\mu}'_{\mathbf{z}_*|\mathcal{D}^{[i]}(t)}$  is sorted in non-descending order. Without loss of generality, agent 1 has the smallest value and agent  $n$  has the largest value, i.e.,  $\check{\mu}'_{\mathbf{z}_*|\mathcal{D}^{[i]}(t)} \leq \check{\mu}'_{\mathbf{z}_*|\mathcal{D}^{[i+1]}(t)}$  for  $i = 1, 2, \dots, n-1$ . Recall that  $\mathcal{T}_{\max}^\mu(t)$  contains  $\lfloor \beta n \rfloor$  agents with the largest local predictive means. For any  $q \in \mathcal{T}_{\max}^\mu(t)$  and  $q' \in \mathcal{M}(t)$ , we have  $\check{\mu}'_{\mathbf{z}_*|\mathcal{D}^{[q]}(t)} \geq \check{\mu}'_{\mathbf{z}_*|\mathcal{D}^{[q']}(t)}$ . Suppose that there exists  $i \in \mathcal{M}(t)$  such that  $\check{\mu}'_{\mathbf{z}_*|\mathcal{D}^{[i]}(t)} > \max_{j \in \mathcal{V} \setminus \mathcal{B}} \{\check{\mu}_{\mathbf{z}_*|\mathcal{D}^{[j]}(t)}\}$ , then we have  $i \in \mathcal{B}$ . For all  $q \in \mathcal{T}_{\max}^\mu(t)$ , we have  $\check{\mu}'_{\mathbf{z}_*|\mathcal{D}^{[q]}(t)} \geq \check{\mu}'_{\mathbf{z}_*|\mathcal{D}^{[i]}(t)} > \max_{j \in \mathcal{V} \setminus \mathcal{B}} \{\check{\mu}_{\mathbf{z}_*|\mathcal{D}^{[j]}(t)}\}$ . Since  $|\mathcal{T}_{\max}^\mu(t)| = \lfloor \beta n \rfloor$ , then we have  $\lfloor \alpha n \rfloor \geq \lfloor \beta n \rfloor + 1$ . It contradicts with  $\alpha \leq \beta$ . Therefore, we have  $\check{\mu}'_{\mathbf{z}_*|\mathcal{D}^{[i]}(t)} \leq \max_{j \in \mathcal{V} \setminus \mathcal{B}} \{\check{\mu}_{\mathbf{z}_*|\mathcal{D}^{[j]}(t)}\}$  for all  $i \in \mathcal{M}(t)$ . Likewise, we have  $\min_{j \in \mathcal{V} \setminus \mathcal{B}} \{\check{\mu}_{\mathbf{z}_*|\mathcal{D}^{[j]}(t)}\} \leq \check{\mu}'_{\mathbf{z}_*|\mathcal{D}^{[i]}(t)}$  for all  $i \in \mathcal{M}(t)$ .

Analogous to the proof of  $\check{\mu}'_{\mathbf{z}_*|\mathcal{D}^{[i]}(t)}$ , we conclude that  $\min_{j \in \mathcal{V} \setminus \mathcal{B}} \{\check{\sigma}_{\mathbf{z}_*|\mathcal{D}^{[j]}(t)}^2\} \leq \check{\sigma}'^2_{\mathbf{z}_*|\mathcal{D}^{[i]}(t)} \leq \max_{j \in \mathcal{V} \setminus \mathcal{B}} \{\check{\sigma}_{\mathbf{z}_*|\mathcal{D}^{[j]}(t)}^2\}$  for all  $i \in \mathcal{C}(t)$ .

### A.3 Proof of Theorem 1

**Part I:** Roadmap of the proof: We first show in Lemma 3 that at time instant  $t$ , the local predictive mean of agent  $i \in \mathcal{V}$  in the attack-free scenario is a sub-Gaussian random variable. Then notice that by triangular inequality, the prediction errors under attacks can be bounded by the magnitude of attacks plus the prediction errors in the attack-free case. Therefore, for  $i \in \mathcal{I}(t)$ , Lemma 4 uses concentration inequalities of sub-Gaussian random variables to quantify the upper bound of the Byzantine attacks. We derive the upper bound of the prediction error in the attack-free case in Lemma 5.

**Lemma 3** *Let Assumptions 2 and 3 hold. For agent  $i \in \mathcal{V}$  and  $\mathbf{z}_* \in \mathcal{Z}_*$ , it holds that  $\check{\mu}_{\mathbf{z}_*|\mathcal{D}^{[i]}(t)}$  is a sub-Gaussian random variable.*

*Proof:* Pick any  $i \in \mathcal{V}$ . Monotonicity of Assumption 2 implies that  $k(\mathbf{z}_*^{[i]}(t), \mathbf{z}_*^{[i]}(t)) = \kappa(0) = \sigma_f^2$ . By Assumption 3, the prior mean is  $\mu(\mathbf{z}_*) = \mu(\mathbf{z}_*^{[i]}(t)) = 0$ . For notational simplicity, we denote the distance by  $D_{\mathbf{z}_*}^{\mathcal{Z}^{[i]}(t)} \triangleq D(\mathbf{z}_*, \mathcal{Z}^{[i]}(t))$ . Hence, by (5), the local predictive mean is computed as  $\check{\mu}_{\mathbf{z}_*|\mathcal{D}^{[i]}(t)} = \frac{\kappa(D_{\mathbf{z}_*}^{\mathcal{Z}^{[i]}(t)})}{\sigma_f^2 + (\sigma_e^{[i]})^2} y_{\mathbf{z}_*^{[i]}(t)}^{[i]}$ . Given the observation model (4),  $y_{\mathbf{z}_*^{[i]}(t)}^{[i]}$  can be decomposed into a deterministic process  $\eta(\mathbf{z}_*^{[i]}(t))$  and a zero-mean Gaussian noise  $y_{\mathbf{z}_*^{[i]}(t)}^{[i]} - \eta(\mathbf{z}_*^{[i]}(t))$ . For agent  $i \in \mathcal{V}$ , we denote the expectation and variance of  $\check{\mu}_{\mathbf{z}_*|\mathcal{D}^{[i]}(t)}$  by  $\mathbb{E}[\check{\mu}_{\mathbf{z}_*|\mathcal{D}^{[i]}(t)}]$  and  $\text{Var}[\check{\mu}_{\mathbf{z}_*|\mathcal{D}^{[i]}(t)}]$ , respectively. Notice that  $y_{\mathbf{z}_*^{[i]}(t)}^{[i]} - \eta(\mathbf{z}_*^{[i]}(t))$  is the only random variable with variance  $(\sigma_e^{[i]})^2$ , and this implies  $\check{\mu}_{\mathbf{z}_*|\mathcal{D}^{[i]}(t)} \sim \mathcal{N}\left(\frac{\kappa(D_{\mathbf{z}_*}^{\mathcal{Z}^{[i]}(t)})}{\sigma_f^2 + (\sigma_e^{[i]})^2} \eta(\mathbf{z}_*^{[i]}(t)), \left(\frac{\kappa(D_{\mathbf{z}_*}^{\mathcal{Z}^{[i]}(t)})}{\sigma_f^2 + (\sigma_e^{[i]})^2}\right)^2 (\sigma_e^{[i]})^2\right)$ . Then for  $\lambda_i \in \mathbb{R}$ , we conduct the following algebraic calculations

$$\mathbb{E}[\exp(\lambda_i(\check{\mu}_{\mathbf{z}_*|\mathcal{D}^{[i]}(t)} - \mathbb{E}[\check{\mu}_{\mathbf{z}_*|\mathcal{D}^{[i]}(t)}]))]$$

$$\begin{aligned}
&= \int_{-\infty}^{+\infty} \frac{\exp\left(-\frac{(\mu - \mathbb{E}[\check{\mu}_{\mathbf{z}_*|\mathcal{D}^{[i]}(t)}])^2}{2\text{Var}[\check{\mu}_{\mathbf{z}_*|\mathcal{D}^{[i]}(t)}]}\right)}{\sqrt{2\pi\text{Var}[\check{\mu}_{\mathbf{z}_*|\mathcal{D}^{[i]}(t)}]}} \exp(\lambda_i(\mu - \mathbb{E}[\check{\mu}_{\mathbf{z}_*|\mathcal{D}^{[i]}(t)}])) d\mu \\
&= \frac{\exp(-\lambda_i\mathbb{E}[\check{\mu}_{\mathbf{z}_*|\mathcal{D}^{[i]}(t)}])}{\sqrt{2\pi\text{Var}[\check{\mu}_{\mathbf{z}_*|\mathcal{D}^{[i]}(t)}]}} \int_{-\infty}^{+\infty} \exp\left(\lambda_i\mu - \frac{(\mu - \mathbb{E}[\check{\mu}_{\mathbf{z}_*|\mathcal{D}^{[i]}(t)}])^2}{2\text{Var}[\check{\mu}_{\mathbf{z}_*|\mathcal{D}^{[i]}(t)}]}\right) d\mu.
\end{aligned}$$

Note that

$$\begin{aligned}
&\exp(-\lambda_i\mathbb{E}[\check{\mu}_{\mathbf{z}_*|\mathcal{D}^{[i]}(t)}]) \exp\left(\lambda_i\mu - \frac{(\mu - \mathbb{E}[\check{\mu}_{\mathbf{z}_*|\mathcal{D}^{[i]}(t)}])^2}{2\text{Var}[\check{\mu}_{\mathbf{z}_*|\mathcal{D}^{[i]}(t)}]}\right) \\
&= \exp\left(-\lambda_i(\mathbb{E}[\check{\mu}_{\mathbf{z}_*|\mathcal{D}^{[i]}(t)}] - \mu) - \frac{(\mu - \mathbb{E}[\check{\mu}_{\mathbf{z}_*|\mathcal{D}^{[i]}(t)}])^2}{2\text{Var}[\check{\mu}_{\mathbf{z}_*|\mathcal{D}^{[i]}(t)}]}\right) \\
&= \exp\left(\frac{-(2\lambda_i\mathbb{E}[\check{\mu}_{\mathbf{z}_*|\mathcal{D}^{[i]}(t)}] - 2\lambda_i\mu)\text{Var}[\check{\mu}_{\mathbf{z}_*|\mathcal{D}^{[i]}(t)}]}{2\text{Var}[\check{\mu}_{\mathbf{z}_*|\mathcal{D}^{[i]}(t)}]}\right) \\
&\quad \times \exp\left(-\frac{\mu^2 - 2\mu\mathbb{E}[\check{\mu}_{\mathbf{z}_*|\mathcal{D}^{[i]}(t)}] + \mathbb{E}[\check{\mu}_{\mathbf{z}_*|\mathcal{D}^{[i]}(t)}]^2}{2\text{Var}[\check{\mu}_{\mathbf{z}_*|\mathcal{D}^{[i]}(t)}]}\right) \\
&= \exp\left(\frac{(\mu - (\lambda_i\text{Var}[\check{\mu}_{\mathbf{z}_*|\mathcal{D}^{[i]}(t)}] + \mathbb{E}[\check{\mu}_{\mathbf{z}_*|\mathcal{D}^{[i]}(t)}]))^2}{-2\text{Var}[\check{\mu}_{\mathbf{z}_*|\mathcal{D}^{[i]}(t)}]}\right) \\
&\quad \times \exp\left(-\lambda_i\mathbb{E}[\check{\mu}_{\mathbf{z}_*|\mathcal{D}^{[i]}(t)}] - \frac{\mathbb{E}[\check{\mu}_{\mathbf{z}_*|\mathcal{D}^{[i]}(t)}]^2}{2\text{Var}[\check{\mu}_{\mathbf{z}_*|\mathcal{D}^{[i]}(t)}]}\right) \exp\left(\frac{(\lambda_i\text{Var}[\check{\mu}_{\mathbf{z}_*|\mathcal{D}^{[i]}(t)}] + \mathbb{E}[\check{\mu}_{\mathbf{z}_*|\mathcal{D}^{[i]}(t)}])^2}{2\text{Var}[\check{\mu}_{\mathbf{z}_*|\mathcal{D}^{[i]}(t)}]}\right) \\
&= \exp\left(\frac{\lambda_i^2\text{Var}[\check{\mu}_{\mathbf{z}_*|\mathcal{D}^{[i]}(t)}]}{2}\right) \exp\left(\frac{(\mu - (\lambda_i\text{Var}[\check{\mu}_{\mathbf{z}_*|\mathcal{D}^{[i]}(t)}] + \mathbb{E}[\check{\mu}_{\mathbf{z}_*|\mathcal{D}^{[i]}(t)}]))^2}{-2\text{Var}[\check{\mu}_{\mathbf{z}_*|\mathcal{D}^{[i]}(t)}]}\right).
\end{aligned}$$

Then we have

$$\begin{aligned}
&\mathbb{E}\left[\exp(\lambda_i(\check{\mu}_{\mathbf{z}_*|\mathcal{D}^{[i]}(t)} - \mathbb{E}[\check{\mu}_{\mathbf{z}_*|\mathcal{D}^{[i]}(t)}]))\right] \\
&= \exp\left(\frac{\lambda_i^2\text{Var}[\check{\mu}_{\mathbf{z}_*|\mathcal{D}^{[i]}(t)}]}{2}\right) \underbrace{\frac{\int_{-\infty}^{+\infty} \exp\left(\frac{(\mu - (\lambda_i\text{Var}[\check{\mu}_{\mathbf{z}_*|\mathcal{D}^{[i]}(t)}] + \mathbb{E}[\check{\mu}_{\mathbf{z}_*|\mathcal{D}^{[i]}(t)}]))^2}{-2\text{Var}[\check{\mu}_{\mathbf{z}_*|\mathcal{D}^{[i]}(t)}]}\right) d\mu}{\sqrt{2\pi\text{Var}[\check{\mu}_{\mathbf{z}_*|\mathcal{D}^{[i]}(t)}]}}}_{=1} \\
&= \exp\left(\frac{\lambda_i^2\text{Var}[\check{\mu}_{\mathbf{z}_*|\mathcal{D}^{[i]}(t)}]}{2}\right). \tag{10}
\end{aligned}$$

The term  $\frac{\exp\left(\frac{(\mu - (\lambda_i\text{Var}[\check{\mu}_{\mathbf{z}_*|\mathcal{D}^{[i]}(t)}] + \mathbb{E}[\check{\mu}_{\mathbf{z}_*|\mathcal{D}^{[i]}(t)}]))^2}{-2\text{Var}[\check{\mu}_{\mathbf{z}_*|\mathcal{D}^{[i]}(t)}]}\right)}{\sqrt{2\pi\text{Var}[\check{\mu}_{\mathbf{z}_*|\mathcal{D}^{[i]}(t)}]}}$  is a Gaussian probability density function

with mean  $\lambda_i\text{Var}[\check{\mu}_{\mathbf{z}_*|\mathcal{D}^{[i]}(t)}] + \mathbb{E}[\check{\mu}_{\mathbf{z}_*|\mathcal{D}^{[i]}(t)}]$  and variance  $\text{Var}[\check{\mu}_{\mathbf{z}_*|\mathcal{D}^{[i]}(t)}]$ . Recall that  $\sigma^2 = \left(\frac{\sigma_f^2\sigma_e^{\max}}{\sigma_f^2 + (\sigma_e^{\min})^2}\right)^2$ . By Assumption 2, it holds that the kernel function  $\kappa(\cdot)$  is monotonically decreasing

and  $\kappa(0) = \sigma_f^2$ . Therefore, we have  $\text{Var}[\check{\mu}_{\mathbf{z}_*|\mathcal{D}^{[i]}(t)}] = \left(\frac{\kappa(D_{\mathbf{z}_*}^{\mathcal{Z}^{[i]}(t)})}{\sigma_f^2 + (\sigma_e^{[i]})^2} \sigma_e^{[i]}\right)^2 \leq \left(\frac{\sigma_f^2\sigma_e^{\max}}{\sigma_f^2 + (\sigma_e^{\min})^2}\right)^2 = \sigma^2$ .

Substituting  $\text{Var}[\check{\mu}_{\mathbf{z}_*|\mathcal{D}^{[i]}(t)}] \leq \sigma^2$  into (10) yields  $\mathbb{E}\left[\exp(\lambda_i(\check{\mu}_{\mathbf{z}_*|\mathcal{D}^{[i]}(t)} - \mathbb{E}[\check{\mu}_{\mathbf{z}_*|\mathcal{D}^{[i]}(t)}]))\right] \leq \exp\left(\frac{\lambda_i^2\sigma^2}{2}\right)$ . Thus by Definition 1, we conclude that  $\check{\mu}_{\mathbf{z}_*|\mathcal{D}^{[i]}(t)}$  is a sub-Gaussian random variable.  $\blacksquare$

**Lemma 4** Let  $0 < \alpha \leq \beta < \frac{1}{4}$  and Assumption 2 hold. For all  $\mathbf{z}_* \in \mathcal{Z}_*$  and  $0 < \delta < 1$ , with probability at least  $1 - \delta$ , it holds that  $\frac{\hat{\sigma}_{\mathbf{z}_*|\mathcal{D}(t)}^2}{|\mathcal{I}(t)|} \sum_{i \in \mathcal{I}(t)} \check{\sigma}'_{\mathbf{z}_*|\mathcal{D}^{[i]}(t)} \left| \check{\mu}'_{\mathbf{z}_*|\mathcal{D}^{[i]}(t)} - \check{\mu}_{\mathbf{z}_*|\mathcal{D}^{[i]}(t)} \right| \leq \frac{2\alpha(\sqrt{2\sigma^2(\ln(2n) - \ln \delta)} + \frac{\sigma_f^2 \|\eta\|_\infty}{\sigma_f^2 + (\sigma_e^{\min})^2})}{1-4\beta} \frac{\sigma_f^4 + \sigma_f^2(\sigma_e^{\max})^2 - \kappa(d^{\max}(t))^2}{\sigma_f^2(\sigma_e^{\min})^2}$ .

*Proof:* We denote by  $\mathcal{F}(t) \triangleq \mathcal{I}(t) \cap (\mathcal{V} \setminus \mathcal{B})$  the set of benign agents in the set  $\mathcal{I}(t)$ . That is,  $\check{\mu}'_{\mathbf{z}_*|\mathcal{D}^{[i]}(t)} = \check{\mu}_{\mathbf{z}_*|\mathcal{D}^{[i]}(t)}$  for all  $i \in \mathcal{F}(t)$ , therefore it holds that  $\frac{\hat{\sigma}_{\mathbf{z}_*|\mathcal{D}(t)}^2}{|\mathcal{I}(t)|} \sum_{i \in \mathcal{F}(t)} \check{\sigma}'_{\mathbf{z}_*|\mathcal{D}^{[i]}(t)} \left| \check{\mu}'_{\mathbf{z}_*|\mathcal{D}^{[i]}(t)} - \check{\mu}_{\mathbf{z}_*|\mathcal{D}^{[i]}(t)} \right| = 0$ . Recall that  $\hat{\sigma}_{\mathbf{z}_*|\mathcal{D}(t)}^2 = \frac{|\mathcal{I}(t)|}{\sum_{j \in \mathcal{I}(t)} \check{\sigma}'_{\mathbf{z}_*|\mathcal{D}^{[j]}(t)}}$ . We have

$$\begin{aligned} & \frac{\hat{\sigma}_{\mathbf{z}_*|\mathcal{D}(t)}^2}{|\mathcal{I}(t)|} \sum_{i \in \mathcal{I}(t)} \check{\sigma}'_{\mathbf{z}_*|\mathcal{D}^{[i]}(t)} \left| \check{\mu}'_{\mathbf{z}_*|\mathcal{D}^{[i]}(t)} - \check{\mu}_{\mathbf{z}_*|\mathcal{D}^{[i]}(t)} \right| \\ &= \frac{\hat{\sigma}_{\mathbf{z}_*|\mathcal{D}(t)}^2}{|\mathcal{I}(t)|} \sum_{i \in \mathcal{I}(t) \cap \mathcal{B}} \check{\sigma}'_{\mathbf{z}_*|\mathcal{D}^{[i]}(t)} \left| \check{\mu}'_{\mathbf{z}_*|\mathcal{D}^{[i]}(t)} - \check{\mu}_{\mathbf{z}_*|\mathcal{D}^{[i]}(t)} \right| \\ & \quad + \underbrace{\frac{\hat{\sigma}_{\mathbf{z}_*|\mathcal{D}(t)}^2}{|\mathcal{I}(t)|} \sum_{i \in \mathcal{F}(t)} \check{\sigma}'_{\mathbf{z}_*|\mathcal{D}^{[i]}(t)} \left| \check{\mu}'_{\mathbf{z}_*|\mathcal{D}^{[i]}(t)} - \check{\mu}_{\mathbf{z}_*|\mathcal{D}^{[i]}(t)} \right|}_{=0} \\ &= \frac{\sum_{i \in \mathcal{I}(t) \cap \mathcal{B}} \check{\sigma}'_{\mathbf{z}_*|\mathcal{D}^{[i]}(t)} \left| \check{\mu}'_{\mathbf{z}_*|\mathcal{D}^{[i]}(t)} - \check{\mu}_{\mathbf{z}_*|\mathcal{D}^{[i]}(t)} \right|}{\sum_{j \in \mathcal{I}(t)} \check{\sigma}'_{\mathbf{z}_*|\mathcal{D}^{[j]}(t)}} \\ &\leq \frac{\sum_{i \in \mathcal{I}(t) \cap \mathcal{B}} \check{\sigma}'_{\mathbf{z}_*|\mathcal{D}^{[i]}(t)} \left( \left| \check{\mu}'_{\mathbf{z}_*|\mathcal{D}^{[i]}(t)} \right| + \left| \check{\mu}_{\mathbf{z}_*|\mathcal{D}^{[i]}(t)} \right| \right)}{\sum_{j \in \mathcal{I}(t)} \check{\sigma}'_{\mathbf{z}_*|\mathcal{D}^{[j]}(t)}}. \end{aligned} \quad (11)$$

In the remaining proof, we find the upper bound of  $\left| \check{\mu}'_{\mathbf{z}_*|\mathcal{D}^{[i]}(t)} \right| + \left| \check{\mu}_{\mathbf{z}_*|\mathcal{D}^{[i]}(t)} \right|$ , and characterize the lower and upper bounds of  $\check{\sigma}'_{\mathbf{z}_*|\mathcal{D}^{[i]}(t)}$ .

1) *The upper bound of  $\left| \check{\mu}'_{\mathbf{z}_*|\mathcal{D}^{[i]}(t)} \right| + \left| \check{\mu}_{\mathbf{z}_*|\mathcal{D}^{[i]}(t)} \right|$ .* By Lemma 2, we have  $\left| \check{\mu}'_{\mathbf{z}_*|\mathcal{D}^{[i]}(t)} \right| \leq \max_{i \in \mathcal{V} \setminus \mathcal{B}} \left\{ \left| \check{\mu}_{\mathbf{z}_*|\mathcal{D}^{[i]}(t)} \right| \right\}$  for all  $i \in \mathcal{I}(t)$ . Then  $\left| \check{\mu}'_{\mathbf{z}_*|\mathcal{D}^{[i]}(t)} \right| + \left| \check{\mu}_{\mathbf{z}_*|\mathcal{D}^{[i]}(t)} \right| \leq 2 \max_{i \in \mathcal{V} \setminus \mathcal{B}} \left\{ \left| \check{\mu}_{\mathbf{z}_*|\mathcal{D}^{[i]}(t)} \right| \right\}$  for all  $i \in \mathcal{I}(t)$ . By Lemma 3, for all  $i \in \mathcal{V}$ ,  $\check{\mu}_{\mathbf{z}_*|\mathcal{D}^{[i]}(t)}$  is a sub-Gaussian random variable. Since  $|\mathcal{V} \setminus \mathcal{B}| = n - \lfloor \alpha n \rfloor$ , by maximal inequality (Theorem 1.14 on page 25 in [28]), for any  $\epsilon_1 > 0$ , we have

$$P \left\{ \max_{i \in \mathcal{V} \setminus \mathcal{B}} \left\{ \left| \check{\mu}_{\mathbf{z}_*|\mathcal{D}^{[i]}(t)} - \frac{\kappa(D_{\mathbf{z}_*}^{\mathcal{Z}^{[i]}(t)})}{\sigma_f^2 + (\sigma_e^{[i]})^2} \eta(\mathbf{z}_*^{[i]}(t)) \right| \right\} \geq \epsilon_1 \right\} \leq 2(n - \lfloor \alpha n \rfloor) e^{-\frac{\epsilon_1^2}{2\sigma^2}} \leq 2ne^{-\frac{\epsilon_1^2}{2\sigma^2}}.$$

For  $0 < \delta < 1$ , choosing  $\epsilon_1 \triangleq \sqrt{2\sigma^2(\ln(2n) - \ln \delta)}$ , with probability at least  $1 - \delta$ , we have

$$\max_{i \in \mathcal{V} \setminus \mathcal{B}} \left\{ \left| \check{\mu}_{\mathbf{z}_*|\mathcal{D}^{[i]}(t)} - \frac{\kappa(D_{\mathbf{z}_*}^{\mathcal{Z}^{[i]}(t)})}{\sigma_f^2 + (\sigma_e^{[i]})^2} \eta(\mathbf{z}_*^{[i]}(t)) \right| \right\} \leq \sqrt{2\sigma^2(\ln(2n) - \ln \delta)}.$$

Since triangular inequality renders

$$\left| \check{\mu}_{\mathbf{z}_*|\mathcal{D}^{[i]}(t)} \right| \leq \left| \check{\mu}_{\mathbf{z}_*|\mathcal{D}^{[i]}(t)} - \frac{\kappa(D_{\mathbf{z}_*}^{\mathcal{Z}^{[i]}(t)})}{\sigma_f^2 + (\sigma_e^{[i]})^2} \eta(\mathbf{z}_*^{[i]}(t)) \right| + \left| \frac{\kappa(D_{\mathbf{z}_*}^{\mathcal{Z}^{[i]}(t)})}{\sigma_f^2 + (\sigma_e^{[i]})^2} \eta(\mathbf{z}_*^{[i]}(t)) \right|,$$

we have

$$\max_{i \in \mathcal{V} \setminus \mathcal{B}} \left\{ \left| \check{\mu}_{\mathbf{z}_*|\mathcal{D}^{[i]}(t)} \right| \right\} \leq \max_{i \in \mathcal{V} \setminus \mathcal{B}} \left\{ \left| \frac{\kappa(D_{\mathbf{z}_*}^{\mathcal{Z}^{[i]}(t)})}{\sigma_f^2 + (\sigma_e^{[i]})^2} \eta(\mathbf{z}_*^{[i]}(t)) \right| \right\}$$

$$+ \max_{i \in \mathcal{V} \setminus \mathcal{B}} \left\{ \left| \check{\mu}_{\mathbf{z}_* | \mathcal{D}^{[i]}(t)} - \frac{\kappa(D_{\mathbf{z}_*}^{\mathcal{Z}^{[i]}(t)})}{\sigma_f^2 + (\sigma_e^{[i]})^2} \eta(\mathbf{z}_*^{[i]}(t)) \right| \right\},$$

which implies that with probability at least  $1 - \delta$ ,

$$\max_{i \in \mathcal{V} \setminus \mathcal{B}} \left\{ \left| \check{\mu}_{\mathbf{z}_* | \mathcal{D}^{[i]}(t)} \right| \right\} \leq \sqrt{2\sigma^2(\ln(2n) - \ln \delta)} + \max_{i \in \mathcal{V} \setminus \mathcal{B}} \left\{ \left| \frac{\kappa(D_{\mathbf{z}_*}^{\mathcal{Z}^{[i]}(t)})}{\sigma_f^2 + (\sigma_e^{[i]})^2} \eta(\mathbf{z}_*^{[i]}(t)) \right| \right\}.$$

Since  $|\eta(\mathbf{z}_*^{[i]}(t))| \leq \|\eta\|_\infty$ , by monotonicity of  $\kappa(\cdot)$  in Assumption 2, it holds that  $\max_{i \in \mathcal{V} \setminus \mathcal{B}} \left\{ \left| \frac{\kappa(D_{\mathbf{z}_*}^{\mathcal{Z}^{[i]}(t)})}{\sigma_f^2 + (\sigma_e^{[i]})^2} \eta(\mathbf{z}_*^{[i]}(t)) \right| \right\} \leq \frac{\sigma_f^2 \|\eta\|_\infty}{\sigma_f^2 + (\sigma_e^{\min})^2}$ . Then with probability at least  $1 - \delta$ , we have

$$\max_{i \in \mathcal{V} \setminus \mathcal{B}} \left\{ \left| \check{\mu}_{\mathbf{z}_* | \mathcal{D}^{[i]}(t)} \right| \right\} \leq \sqrt{2\sigma^2(\ln(2n) - \ln \delta)} + \frac{\sigma_f^2 \|\eta\|_\infty}{\sigma_f^2 + (\sigma_e^{\min})^2}.$$

Therefore, with probability at least  $1 - \delta$ , we have

$$\begin{aligned} \left| \check{\mu}'_{\mathbf{z}_* | \mathcal{D}^{[i]}(t)} \right| + \left| \check{\mu}_{\mathbf{z}_* | \mathcal{D}^{[i]}(t)} \right| &\leq 2 \max_{i \in \mathcal{V} \setminus \mathcal{B}} \left\{ \left| \check{\mu}_{\mathbf{z}_* | \mathcal{D}^{[i]}(t)} \right| \right\} \\ &\leq 2(\sqrt{2\sigma^2(\ln(2n) - \ln \delta)} + \frac{\sigma_f^2 \|\eta\|_\infty}{\sigma_f^2 + (\sigma_e^{\min})^2}). \end{aligned} \quad (12)$$

2) *The lower and upper bounds of  $\check{\sigma}'_{\mathbf{z}_* | \mathcal{D}^{[i]}(t)}$ .* Lemma 2 renders that  $\min_{j \in \mathcal{V} \setminus \mathcal{B}} \left\{ \check{\sigma}'_{\mathbf{z}_* | \mathcal{D}^{[j]}(t)} \right\} \leq \check{\sigma}'_{\mathbf{z}_* | \mathcal{D}^{[i]}(t)} \leq \max_{j \in \mathcal{V} \setminus \mathcal{B}} \left\{ \check{\sigma}'_{\mathbf{z}_* | \mathcal{D}^{[j]}(t)} \right\}$  for all  $i \in \mathcal{I}(t)$ , then we have  $\left( \max_{j \in \mathcal{V} \setminus \mathcal{B}} \left\{ \check{\sigma}'_{\mathbf{z}_* | \mathcal{D}^{[j]}(t)} \right\} \right)^{-1} \leq \check{\sigma}'_{\mathbf{z}_* | \mathcal{D}^{[i]}(t)} \leq \left( \min_{j \in \mathcal{V} \setminus \mathcal{B}} \left\{ \check{\sigma}'_{\mathbf{z}_* | \mathcal{D}^{[j]}(t)} \right\} \right)^{-1}$  for all  $i \in \mathcal{I}(t)$ . Theorem IV.3 in [29] gives  $\frac{\sigma_f^2 (\sigma_e^{[i]})^2}{\sigma_f^2 + (\sigma_e^{[i]})^2} \leq \check{\sigma}'_{\mathbf{z}_* | \mathcal{D}^{[i]}(t)} \leq \sigma_f^2 - \frac{\kappa(d^{[i]}(t))^2}{\sigma_f^2 + (\sigma_e^{[i]})^2}$  for all  $\mathbf{z}_* \in \mathcal{Z}_*$ . By monotonicity of  $\kappa(\cdot)$  in Assumption 2, it holds that  $\frac{\sigma_f^2 (\sigma_e^{\min})^2}{\sigma_f^2 + (\sigma_e^{\max})^2} \leq \check{\sigma}'_{\mathbf{z}_* | \mathcal{D}^{[i]}(t)} \leq \sigma_f^2 - \frac{\kappa(d^{\max}(t))^2}{\sigma_f^2 + (\sigma_e^{\max})^2}$ , which implies that for any  $i \in \mathcal{I}(t)$ ,  $\mathbf{z}_* \in \mathcal{Z}_*$ ,

$$\frac{\sigma_f^2 + (\sigma_e^{\max})^2}{\sigma_f^4 + \sigma_f^2 (\sigma_e^{\max})^2 - \kappa(d^{\max}(t))^2} \leq \check{\sigma}'_{\mathbf{z}_* | \mathcal{D}^{[i]}(t)} \leq \frac{\sigma_f^2 + (\sigma_e^{\max})^2}{\sigma_f^2 (\sigma_e^{\min})^2}.$$

Lemma 1 shows that  $|\mathcal{I}(t)| \geq n - 4\lfloor \beta n \rfloor$ . Since  $\lfloor \beta n \rfloor \leq \beta n$ , it indicates that  $|\mathcal{I}(t)| \geq (1 - 4\beta)n$ . Then we have

$$\sum_{j \in \mathcal{I}(t)} \check{\sigma}'_{\mathbf{z}_* | \mathcal{D}^{[j]}(t)} \geq \frac{(1 - 4\beta)n \left( \sigma_f^2 + (\sigma_e^{\max})^2 \right)}{\sigma_f^4 + \sigma_f^2 (\sigma_e^{\max})^2 - \kappa(d^{\max}(t))^2}. \quad (13)$$

Since  $|\mathcal{I}(t) \cap \mathcal{B}| \leq |\mathcal{B}| = \lfloor \alpha n \rfloor \leq \alpha n$ , by (12), with probability at least  $1 - \delta$ , we have

$$\begin{aligned} \sum_{i \in \mathcal{I}(t) \cap \mathcal{B}} \check{\sigma}'_{\mathbf{z}_* | \mathcal{D}^{[i]}(t)} \left( \left| \check{\mu}'_{\mathbf{z}_* | \mathcal{D}^{[i]}(t)} \right| + \left| \check{\mu}_{\mathbf{z}_* | \mathcal{D}^{[i]}(t)} \right| \right) \\ \leq 2\alpha n (\sqrt{2\sigma^2(\ln(2n) - \ln \delta)} + \frac{\sigma_f^2 \|\eta\|_\infty}{\sigma_f^2 + (\sigma_e^{\min})^2}) \frac{\sigma_f^2 + (\sigma_e^{\max})^2}{\sigma_f^2 (\sigma_e^{\min})^2}. \end{aligned} \quad (14)$$

Combining (13) and (14) with (11) renders that with probability at least  $1 - \delta$ , it holds that

$$\begin{aligned} \frac{\hat{\sigma}_{\mathbf{z}_* | \mathcal{D}(t)}^2}{|\mathcal{I}(t)|} \sum_{i \in \mathcal{I}(t)} \check{\sigma}'_{\mathbf{z}_* | \mathcal{D}^{[i]}(t)} \left| \check{\mu}'_{\mathbf{z}_* | \mathcal{D}^{[i]}(t)} - \check{\mu}_{\mathbf{z}_* | \mathcal{D}^{[i]}(t)} \right| \\ \leq \frac{2\alpha (\sqrt{2\sigma^2(\ln(2n) - \ln \delta)} + \frac{\sigma_f^2 \|\eta\|_\infty}{\sigma_f^2 + (\sigma_e^{\min})^2}) \sigma_f^4 + \sigma_f^2 (\sigma_e^{\max})^2 - \kappa(d^{\max}(t))^2}{1 - 4\beta} \frac{1}{\sigma_f^2 (\sigma_e^{\min})^2}. \end{aligned}$$

■

The following Lemma characterizes the upper bound of the prediction error in the attack-free case.

**Lemma 5** Suppose Assumptions 2 and 3 hold. For  $\mathbf{z}_* \in \mathcal{Z}_*$ , with probability at least  $1 - \delta$ , it holds that  $\frac{\hat{\sigma}_{\mathbf{z}_*}^2 | \mathcal{D}(t)}{|\mathcal{I}(t)|} \sum_{i \in \mathcal{I}(t)} \check{\sigma}_{\mathbf{z}_*}^{i-2} | \check{\mu}_{\mathbf{z}_*} | \mathcal{D}^{[i]}(t) - \eta(\mathbf{z}_*)| \leq (1 - \frac{\kappa(d^{\max}(t))}{\sigma_f^2 + (\sigma_e^{\max})^2}) \|\eta\|_\infty + \frac{\sigma_f^2}{\sigma_f^2 + (\sigma_e^{\min})^2} \ell_\eta d^{\max}(t) + \sqrt{2\sigma^2(\ln 2 - \ln \delta)}$ .

*Proof:* Recall that  $\check{\mu}_{\mathbf{z}_*} | \mathcal{D}^{[i]}(t) = \frac{\kappa(D_{\mathbf{z}_*}^{\mathcal{Z}^{[i]}(t)})}{\sigma_f^2 + (\sigma_e^{[i]})^2} y_{\mathbf{z}_*}^{[i]}(t)$ . Then for  $i \in \mathcal{V}$ , we have

$$\begin{aligned} \check{\mu}_{\mathbf{z}_*} | \mathcal{D}^{[i]}(t) - \eta(\mathbf{z}_*) &= (1 - \frac{\kappa(D_{\mathbf{z}_*}^{\mathcal{Z}^{[i]}(t)})}{\sigma_f^2 + (\sigma_e^{[i]})^2})(-\eta(\mathbf{z}_*)) + \frac{\kappa(D_{\mathbf{z}_*}^{\mathcal{Z}^{[i]}(t)})}{\sigma_f^2 + (\sigma_e^{[i]})^2} (y_{\mathbf{z}_*}^{[i]}(t) - \eta(\mathbf{z}_*^{[i]}(t))) \\ &\quad + \frac{\kappa(D_{\mathbf{z}_*}^{\mathcal{Z}^{[i]}(t)})}{\sigma_f^2 + (\sigma_e^{[i]})^2} (\eta(\mathbf{z}_*^{[i]}(t)) - \eta(\mathbf{z}_*)). \end{aligned}$$

By triangular inequality, we have

$$\begin{aligned} |\check{\mu}_{\mathbf{z}_*} | \mathcal{D}^{[i]}(t) - \eta(\mathbf{z}_*)| &\leq \frac{\kappa(D_{\mathbf{z}_*}^{\mathcal{Z}^{[i]}(t)})}{\sigma_f^2 + (\sigma_e^{[i]})^2} |\eta(\mathbf{z}_*^{[i]}(t)) - \eta(\mathbf{z}_*)| + \frac{\kappa(D_{\mathbf{z}_*}^{\mathcal{Z}^{[i]}(t)})}{\sigma_f^2 + (\sigma_e^{[i]})^2} |y_{\mathbf{z}_*}^{[i]}(t) - \eta(\mathbf{z}_*^{[i]}(t))| \\ &\quad + (1 - \frac{\kappa(D_{\mathbf{z}_*}^{\mathcal{Z}^{[i]}(t)})}{\sigma_f^2 + (\sigma_e^{[i]})^2}) |\eta(\mathbf{z}_*)|. \end{aligned} \quad (15)$$

We analyze the upper bound of each term on the right-hand side of the inequality (15).

*Term 1.* Recall that  $\mathbf{z}_*^{[i]}(t) \in \text{proj}(\mathbf{z}_*, \mathcal{Z}^{[i]}(t))$ . The Lipschitz continuity of  $\eta$  in Assumption 3 gives

$$\frac{\kappa(D_{\mathbf{z}_*}^{\mathcal{Z}^{[i]}(t)})}{\sigma_f^2 + (\sigma_e^{[i]})^2} |\eta(\mathbf{z}_*^{[i]}(t)) - \eta(\mathbf{z}_*)| \leq \frac{\kappa(D_{\mathbf{z}_*}^{\mathcal{Z}^{[i]}(t)})}{\sigma_f^2 + (\sigma_e^{[i]})^2} \ell_\eta D_{\mathbf{z}_*}^{\mathcal{Z}^{[i]}(t)} \leq \frac{\sigma_f^2}{\sigma_f^2 + (\sigma_e^{\min})^2} \ell_\eta d^{\max}(t). \quad (16)$$

*Term 2.* Recall that  $\check{\mu}_{\mathbf{z}_*} | \mathcal{D}^{[i]}(t)$  follows a Gaussian probability distribution and  $\check{\mu}_{\mathbf{z}_*} | \mathcal{D}^{[i]}(t) \sim \mathcal{N}\left(\frac{\kappa(D_{\mathbf{z}_*}^{\mathcal{Z}^{[i]}(t)})}{\sigma_f^2 + (\sigma_e^{[i]})^2} \eta(\mathbf{z}_*^{[i]}(t)), \left(\frac{\kappa(D_{\mathbf{z}_*}^{\mathcal{Z}^{[i]}(t)})}{\sigma_f^2 + (\sigma_e^{[i]})^2}\right)^2 (\sigma_e^{[i]})^2\right)$ . By Lemma 3, for all  $i \in \mathcal{V}$ , we have that  $\check{\mu}_{\mathbf{z}_*} | \mathcal{D}^{[i]}(t)$  is a sub-Gaussian random variable. Then by concentration inequality of the sub-Gaussian random variable (see Lemma 1.3 of [28]), for any  $\epsilon_2 > 0$ , we have

$$P\left\{\left|\check{\mu}_{\mathbf{z}_*} | \mathcal{D}^{[i]}(t) - \frac{\kappa(D_{\mathbf{z}_*}^{\mathcal{Z}^{[i]}(t)})}{\sigma_f^2 + (\sigma_e^{[i]})^2} \eta(\mathbf{z}_*^{[i]}(t))\right| > \epsilon_2\right\} \leq 2e^{-\frac{\epsilon_2^2}{2\sigma^2}}.$$

Combining the above inequality with  $\check{\mu}_{\mathbf{z}_*} | \mathcal{D}^{[i]}(t) = \frac{\kappa(D_{\mathbf{z}_*}^{\mathcal{Z}^{[i]}(t)})}{\sigma_f^2 + (\sigma_e^{[i]})^2} y_{\mathbf{z}_*}^{[i]}(t)$ , for  $0 < \delta < 1$ , choosing  $\epsilon_2 \triangleq \sqrt{2\sigma^2(\ln 2 - \ln \delta)}$ , with probability at least  $1 - \delta$ , it holds

$$\frac{\kappa(D_{\mathbf{z}_*}^{\mathcal{Z}^{[i]}(t)})}{\sigma_f^2 + (\sigma_e^{[i]})^2} |y_{\mathbf{z}_*}^{[i]}(t) - \eta(\mathbf{z}_*^{[i]}(t))| = \left|\check{\mu}_{\mathbf{z}_*} | \mathcal{D}^{[i]}(t) - \frac{\kappa(D_{\mathbf{z}_*}^{\mathcal{Z}^{[i]}(t)})}{\sigma_f^2 + (\sigma_e^{[i]})^2} \eta(\mathbf{z}_*^{[i]}(t))\right| \leq \sqrt{2\sigma^2(\ln 2 - \ln \delta)}. \quad (17)$$

*Term 3.* We have  $|\eta(\mathbf{z}_*)| \leq \|\eta\|_\infty$ . By monotonicity of  $\kappa(\cdot)$  in Assumption 2, it gives

$$(1 - \frac{\kappa(D_{\mathbf{z}_*}^{\mathcal{Z}^{[i]}(t)})}{\sigma_f^2 + (\sigma_e^{[i]})^2}) |\eta(\mathbf{z}_*)| \leq (1 - \frac{\kappa(d^{\max}(t))}{\sigma_f^2 + (\sigma_e^{\max})^2}) \|\eta\|_\infty. \quad (18)$$

Therefore, applying the inequalities (16), (17) and (18) to (15), for  $0 < \delta < 1$ , with probability at least  $1 - \delta$ , we have that for all  $i \in \mathcal{I}(t)$ ,

$$|\check{\mu}_{\mathbf{z}_*|\mathcal{D}^{[i]}(t)} - \eta(\mathbf{z}_*)| \leq \left(1 - \frac{\kappa(d^{\max}(t))}{\sigma_f^2 + (\sigma_e^{\max})^2}\right) \|\eta\|_\infty + \frac{\sigma_f^2 \ell_\eta d^{\max}(t)}{\sigma_f^2 + (\sigma_e^{\min})^2} + \sqrt{2\sigma^2(\ln 2 - \ln \delta)}. \quad (19)$$

By (7), we have  $0 < \frac{\hat{\sigma}_{\mathbf{z}_*|\mathcal{D}(t)}^2}{|\mathcal{I}(t)|} \check{\sigma}'_{\mathbf{z}_*|\mathcal{D}^{[i]}(t)}{}^{-2} < 1$  and  $\frac{\hat{\sigma}_{\mathbf{z}_*|\mathcal{D}(t)}^2}{|\mathcal{I}(t)|} \sum_{i \in \mathcal{I}(t)} \check{\sigma}'_{\mathbf{z}_*|\mathcal{D}^{[i]}(t)}{}^{-2} = 1$ , which implies that with probability at least  $1 - \delta$ , it holds that  $\frac{\hat{\sigma}_{\mathbf{z}_*|\mathcal{D}(t)}^2}{|\mathcal{I}(t)|} \sum_{i \in \mathcal{I}(t)} \check{\sigma}'_{\mathbf{z}_*|\mathcal{D}^{[i]}(t)}{}^{-2} |\check{\mu}_{\mathbf{z}_*|\mathcal{D}^{[i]}(t)} - \eta(\mathbf{z}_*)| \leq \left(1 - \frac{\kappa(d^{\max}(t))}{\sigma_f^2 + (\sigma_e^{\max})^2}\right) \|\eta\|_\infty + \frac{\sigma_f^2 \ell_\eta d^{\max}(t)}{\sigma_f^2 + (\sigma_e^{\min})^2} + \sqrt{2\sigma^2(\ln 2 - \ln \delta)}$ . ■

With Lemmas 3, 4 and 5, we now proceed to complete the proof of part I in Theorem 1.

*Proof of part I in Theorem 1:* Note that, given (7), we have

$$\begin{aligned} |\hat{\mu}_{\mathbf{z}_*|\mathcal{D}(t)} - \eta(\mathbf{z}_*)| &= \left| \frac{\hat{\sigma}_{\mathbf{z}_*|\mathcal{D}(t)}^2}{|\mathcal{I}(t)|} \sum_{i \in \mathcal{I}(t)} \check{\mu}'_{\mathbf{z}_*|\mathcal{D}^{[i]}(t)} \check{\sigma}'_{\mathbf{z}_*|\mathcal{D}^{[i]}(t)}{}^{-2} - \eta(\mathbf{z}_*) \right| \\ &= \left| \frac{\hat{\sigma}_{\mathbf{z}_*|\mathcal{D}(t)}^2}{|\mathcal{I}(t)|} \sum_{i \in \mathcal{I}(t)} \check{\mu}'_{\mathbf{z}_*|\mathcal{D}^{[i]}(t)} \check{\sigma}'_{\mathbf{z}_*|\mathcal{D}^{[i]}(t)}{}^{-2} - \frac{\hat{\sigma}_{\mathbf{z}_*|\mathcal{D}(t)}^2}{|\mathcal{I}(t)|} \sum_{i \in \mathcal{I}(t)} \check{\mu}_{\mathbf{z}_*|\mathcal{D}^{[i]}(t)} \check{\sigma}'_{\mathbf{z}_*|\mathcal{D}^{[i]}(t)}{}^{-2} \right. \\ &\quad \left. + \frac{\hat{\sigma}_{\mathbf{z}_*|\mathcal{D}(t)}^2}{|\mathcal{I}(t)|} \sum_{i \in \mathcal{I}(t)} \check{\mu}_{\mathbf{z}_*|\mathcal{D}^{[i]}(t)} \check{\sigma}'_{\mathbf{z}_*|\mathcal{D}^{[i]}(t)}{}^{-2} - \eta(\mathbf{z}_*) \right|. \end{aligned} \quad (20)$$

Since  $\frac{\hat{\sigma}_{\mathbf{z}_*|\mathcal{D}(t)}^2}{|\mathcal{I}(t)|} \sum_{i \in \mathcal{I}(t)} \check{\sigma}'_{\mathbf{z}_*|\mathcal{D}^{[i]}(t)}{}^{-2} = 1$ , then this implies that  $\frac{\hat{\sigma}_{\mathbf{z}_*|\mathcal{D}(t)}^2}{|\mathcal{I}(t)|} \sum_{i \in \mathcal{I}(t)} \check{\mu}_{\mathbf{z}_*|\mathcal{D}^{[i]}(t)} \check{\sigma}'_{\mathbf{z}_*|\mathcal{D}^{[i]}(t)}{}^{-2} - \eta(\mathbf{z}_*) = \frac{\hat{\sigma}_{\mathbf{z}_*|\mathcal{D}(t)}^2}{|\mathcal{I}(t)|} \sum_{i \in \mathcal{I}(t)} \check{\sigma}'_{\mathbf{z}_*|\mathcal{D}^{[i]}(t)}{}^{-2} (\check{\mu}_{\mathbf{z}_*|\mathcal{D}^{[i]}(t)} - \eta(\mathbf{z}_*))$ . Therefore, by triangular inequality, (20) is upper bounded as

$$\begin{aligned} &\left| \frac{\hat{\sigma}_{\mathbf{z}_*|\mathcal{D}(t)}^2}{|\mathcal{I}(t)|} \sum_{i \in \mathcal{I}(t)} \check{\mu}'_{\mathbf{z}_*|\mathcal{D}^{[i]}(t)} \check{\sigma}'_{\mathbf{z}_*|\mathcal{D}^{[i]}(t)}{}^{-2} - \eta(\mathbf{z}_*) \right| \\ &\leq \frac{\hat{\sigma}_{\mathbf{z}_*|\mathcal{D}(t)}^2}{|\mathcal{I}(t)|} \sum_{i \in \mathcal{I}(t)} \check{\sigma}'_{\mathbf{z}_*|\mathcal{D}^{[i]}(t)}{}^{-2} |\check{\mu}_{\mathbf{z}_*|\mathcal{D}^{[i]}(t)} - \eta(\mathbf{z}_*)| \\ &\quad + \frac{\hat{\sigma}_{\mathbf{z}_*|\mathcal{D}(t)}^2}{|\mathcal{I}(t)|} \sum_{i \in \mathcal{I}(t)} \check{\sigma}'_{\mathbf{z}_*|\mathcal{D}^{[i]}(t)}{}^{-2} |\check{\mu}'_{\mathbf{z}_*|\mathcal{D}^{[i]}(t)} - \check{\mu}_{\mathbf{z}_*|\mathcal{D}^{[i]}(t)}|. \end{aligned}$$

Then, combining this with Lemmas 4 and 5, we complete the proof of part I.

**Part II:** We give the upper bound and lower bound of  $\hat{\sigma}_{\mathbf{z}_*|\mathcal{D}(t)}^2$  as follows:

1) Upper bound. Recall that  $\hat{\sigma}_{\mathbf{z}_*|\mathcal{D}(t)}^2 = \frac{|\mathcal{I}(t)|}{\sum_{i \in \mathcal{I}(t)} \check{\sigma}'_{\mathbf{z}_*|\mathcal{D}^{[i]}(t)}{}^{-2}}$ . Note that  $f(x) = \frac{1}{x}$  is a convex function for  $x > 0$ . By Jensen's inequality (see page 21 in [30]), we have  $f(\frac{1}{n} \sum_{i=1}^n x_i) \leq \frac{1}{n} \sum_{i=1}^n f(x_i)$ . Then plugging in  $x_i = \check{\sigma}'_{\mathbf{z}_*|\mathcal{D}^{[i]}(t)}{}^{-2}$ , we have

$$\hat{\sigma}_{\mathbf{z}_*|\mathcal{D}(t)}^2 = \frac{|\mathcal{I}(t)|}{\sum_{i \in \mathcal{I}(t)} \check{\sigma}'_{\mathbf{z}_*|\mathcal{D}^{[i]}(t)}{}^{-2}} = f\left(\frac{\sum_{i \in \mathcal{I}(t)} \check{\sigma}'_{\mathbf{z}_*|\mathcal{D}^{[i]}(t)}{}^{-2}}{|\mathcal{I}(t)|}\right) \leq \frac{1}{|\mathcal{I}(t)|} \sum_{i \in \mathcal{I}(t)} \check{\sigma}'_{\mathbf{z}_*|\mathcal{D}^{[i]}(t)}{}^{-2}.$$

It suffices to show the upper bound of  $\sum_{i \in \mathcal{I}(t)} \check{\sigma}'_{\mathbf{z}_*|\mathcal{D}^{[i]}(t)}{}^{-2}$ . We decompose the agent set  $\mathcal{I}(t)$  into two subsets  $\mathcal{F}(t)$  and  $\mathcal{I}(t) \cap \mathcal{B}$  where  $\mathcal{F}(t) \triangleq \mathcal{I}(t) \cap (\mathcal{V} \setminus \mathcal{B})$  contains the benign agents and  $\mathcal{I}(t) \cap \mathcal{B}$  contains the Byzantine agents, then we have

$$\sum_{i \in \mathcal{I}(t)} \check{\sigma}'_{\mathbf{z}_*|\mathcal{D}^{[i]}(t)}{}^{-2} = \sum_{i \in \mathcal{F}(t)} \check{\sigma}'_{\mathbf{z}_*|\mathcal{D}^{[i]}(t)}{}^{-2} + \sum_{i \in \mathcal{I}(t) \cap \mathcal{B}} \check{\sigma}'_{\mathbf{z}_*|\mathcal{D}^{[i]}(t)}{}^{-2}. \quad (21)$$

We proceed to analyze each term on the right-hand side of (21).

First, notice that  $\mathcal{F}(t)$  is the set of benign agents, hence it holds that  $\check{\sigma}_{z_*|\mathcal{D}^{[i]}(t)}^{\prime 2} = \check{\sigma}_{z_*|\mathcal{D}^{[i]}(t)}^2$  for all  $i \in \mathcal{F}(t)$ . According to Theorem IV.3 in [29], we have  $\check{\sigma}_{z_*|\mathcal{D}^{[i]}(t)}^2 \leq \sigma_f^2 - \frac{\kappa(d^{[i]}(t))^2}{\sigma_f^2 + (\sigma_e^{[i]})^2}$  for all  $z_* \in \mathcal{Z}_*$ . Monotonicity of  $\kappa(\cdot)$  in Assumption 2 shows that  $\kappa(d^{\max}(t))^2 \leq \kappa(d^{[i]}(t))^2$ , which indicates  $\frac{\kappa(d^{\max}(t))^2}{\sigma_f^2 + (\sigma_e^{\max})^2} \leq \frac{\kappa(d^{[i]}(t))^2}{\sigma_f^2 + (\sigma_e^{[i]})^2}$ . Therefore, we have

$$\sum_{i \in \mathcal{F}(t)} \check{\sigma}_{z_*|\mathcal{D}^{[i]}(t)}^{\prime 2} \leq \sum_{i \in \mathcal{F}(t)} \left( \sigma_f^2 - \frac{\kappa(d^{[i]}(t))^2}{\sigma_f^2 + (\sigma_e^{[i]})^2} \right) \leq |\mathcal{F}(t)| \left( \sigma_f^2 - \frac{\kappa(d^{\max}(t))^2}{\sigma_f^2 + (\sigma_e^{\max})^2} \right). \quad (22)$$

Second, by Lemma 2, we have

$$\begin{aligned} \sum_{i \in \mathcal{I}(t) \cap \mathcal{B}} \check{\sigma}_{z_*|\mathcal{D}^{[i]}(t)}^{\prime 2} &\leq \sum_{i \in \mathcal{I}(t) \cap \mathcal{B}} \max_{i \in \mathcal{V} \setminus \mathcal{B}} \left\{ \check{\sigma}_{z_*|\mathcal{D}^{[i]}(t)}^2 \right\} \\ &\leq \sum_{i \in \mathcal{I}(t) \cap \mathcal{B}} \max_{i \in \mathcal{V} \setminus \mathcal{B}} \left\{ \sigma_f^2 - \frac{\kappa(d^{[i]}(t))^2}{\sigma_f^2 + (\sigma_e^{[i]})^2} \right\} = |\mathcal{I}(t) \cap \mathcal{B}| \left( \sigma_f^2 - \frac{\kappa(d^{\max}(t))^2}{\sigma_f^2 + (\sigma_e^{\max})^2} \right). \end{aligned} \quad (23)$$

Therefore, combining (21) with (22) and (23), the upper bound of  $\hat{\sigma}_{z_*|\mathcal{D}(t)}^2$  is given as

$$\hat{\sigma}_{z_*|\mathcal{D}(t)}^2 \leq \sigma_f^2 - \frac{\kappa(d^{\max}(t))^2}{\sigma_f^2 + (\sigma_e^{\max})^2}. \quad (24)$$

2) Lower bound. Similar to (21), we have

$$\sum_{i \in \mathcal{I}(t)} \check{\sigma}_{z_*|\mathcal{D}^{[i]}(t)}^{\prime -2} = \sum_{i \in \mathcal{F}(t)} \check{\sigma}_{z_*|\mathcal{D}^{[i]}(t)}^{\prime -2} + \sum_{i \in \mathcal{I}(t) \cap \mathcal{B}} \check{\sigma}_{z_*|\mathcal{D}^{[i]}(t)}^{\prime -2}. \quad (25)$$

First, it holds that  $\check{\sigma}_{z_*|\mathcal{D}^{[i]}(t)}^{\prime -2} = \check{\sigma}_{z_*|\mathcal{D}^{[i]}(t)}^{-2}$  for all  $i \in \mathcal{F}(t)$ . Theorem IV.3 in [29] gives  $\check{\sigma}_{z_*|\mathcal{D}^{[i]}(t)}^2 \geq \frac{\sigma_f^2 (\sigma_e^{[i]})^2}{\sigma_f^2 + (\sigma_e^{[i]})^2}$  for all  $z_* \in \mathcal{Z}_*$ . Then following the logic of deriving the above upper bound, we have

$$\sum_{i \in \mathcal{F}(t)} \check{\sigma}_{z_*|\mathcal{D}^{[i]}(t)}^{\prime -2} \leq \sum_{i \in \mathcal{F}(t)} \frac{\sigma_f^2 + (\sigma_e^{[i]})^2}{\sigma_f^2 (\sigma_e^{[i]})^2} \leq |\mathcal{F}(t)| \frac{\sigma_f^2 + (\sigma_e^{\max})^2}{\sigma_f^2 (\sigma_e^{\min})^2}. \quad (26)$$

Second, Lemma 2 implies the following inequality

$$\begin{aligned} \sum_{i \in \mathcal{I}(t) \cap \mathcal{B}} \check{\sigma}_{z_*|\mathcal{D}^{[i]}(t)}^{\prime -2} &\leq \sum_{i \in \mathcal{I}(t) \cap \mathcal{B}} \left( \min_{i \in \mathcal{V} \setminus \mathcal{B}} \left\{ \check{\sigma}_{z_*|\mathcal{D}^{[i]}(t)}^2 \right\} \right)^{-1} \leq \sum_{i \in \mathcal{I}(t) \cap \mathcal{B}} \left( \min_{i \in \mathcal{V} \setminus \mathcal{B}} \left\{ \frac{\sigma_f^2 (\sigma_e^{[i]})^2}{\sigma_f^2 + (\sigma_e^{[i]})^2} \right\} \right)^{-1} \\ &\leq |\mathcal{I}(t) \cap \mathcal{B}| \frac{\sigma_f^2 + (\sigma_e^{\max})^2}{\sigma_f^2 (\sigma_e^{\min})^2}. \end{aligned} \quad (27)$$

Therefore, combining (25) with (26) and (27) yields an upper bound of  $\sum_{i \in \mathcal{I}(t)} \check{\sigma}_{z_*|\mathcal{D}^{[i]}(t)}^{\prime -2}$ , i.e.,  $\sum_{i \in \mathcal{I}(t)} \check{\sigma}_{z_*|\mathcal{D}^{[i]}(t)}^{\prime -2} \leq |\mathcal{I}(t)| \frac{\sigma_f^2 + (\sigma_e^{\max})^2}{\sigma_f^2 (\sigma_e^{\min})^2}$ . Recall that  $\hat{\sigma}_{z_*|\mathcal{D}(t)}^2 = \frac{|\mathcal{I}(t)|}{\sum_{i \in \mathcal{I}(t)} \check{\sigma}_{z_*|\mathcal{D}^{[i]}(t)}^{\prime -2}}$ , then we have

$$\hat{\sigma}_{z_*|\mathcal{D}(t)}^2 \geq \frac{\sigma_f^2 (\sigma_e^{\min})^2}{\sigma_f^2 + (\sigma_e^{\max})^2}. \quad (28)$$

Thus, combining (24) and (28), the proof is complete.
